CORRECTION

# Correction: Value sets and the problem of redundancy in value set repositories

Sigfried Gold, Harold P. Lehmann, Lisa M. Schilling, Wayne G. Lutters

The hyperlink to the OSF repository in the Data Availability statement is incorrect. The correct hyperlink is: <https://osf.io/abtju>.

## Reference

1. Gold S, Lehmann HP, Schilling LM, Lutters WG. Value sets and the problem of redundancy in value set repositories. PLoS One. 2024;19(12): e0312289. <https://doi.org/10.1371/journal.pone.0312289> PMID: [39652546](https://pubmed.ncbi.nlm.nih.gov/39652546/)

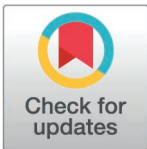

## OPEN ACCESS

**Citation:** Gold S, Lehmann HP, Schilling LM, Lutters WG (2025) Correction: Value sets and the problem of redundancy in value set repositories. PLoS ONE 20(4): e0322239. <https://doi.org/10.1371/journal.pone.0322239>

**Published:** April 4, 2025

**Copyright:** © 2025 Gold et al. This is an open access article distributed under the terms of the [Creative Commons Attribution License](https://creativecommons.org/licenses/by/4.0/), which permits unrestricted use, distribution, and reproduction in any medium, provided the original author and source are credited.
